# Supplementary material for: A flexible ultraviolet photodetector based on single crystalline MoO3 nanosheets
Source: Royal Society of Chemistry journal article supplement (doi:10.1039/c5tc00850f), 2015-01-01
Supplement: c5tc00850f1.pdf [file c5tc00850f1.pdf]

# Flexible ultraviolet photodetector based on single crystalline $\text{MoO}_3$ nanosheet

Qinghong Zheng,<sup>\*a</sup> Jin Huang,<sup>b</sup> Shilin Cao,<sup>a</sup> and Haili Gao<sup>a</sup>

<sup>a</sup>College of Materials Engineering, Fujian Agriculture and Forestry University, Fuzhou 350002, People's Republic of China. E-mail: qhzheng@fafu.edu.cn.

<sup>b</sup>Fujian Institute of Research on the Structure of Matter, Chinese Academy of Sciences, Fuzhou, 350002, People's Republic of China.

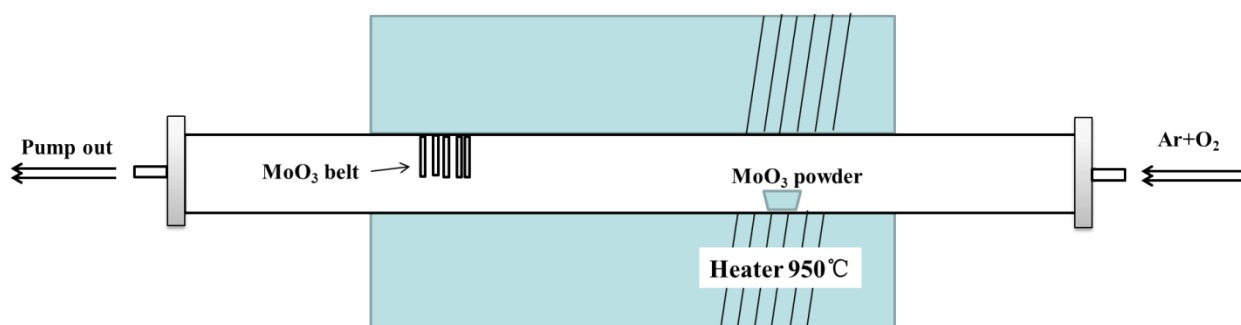

**Fig. S1** Schematic diagram of the horizontal physical vapor deposition system

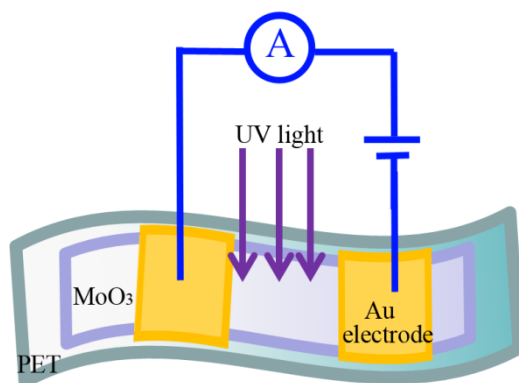

**Fig. S2** Schematic diagram of the flexible metal-semiconductor-metal structure UVPD based on  $\text{MoO}_3/\text{PET}$

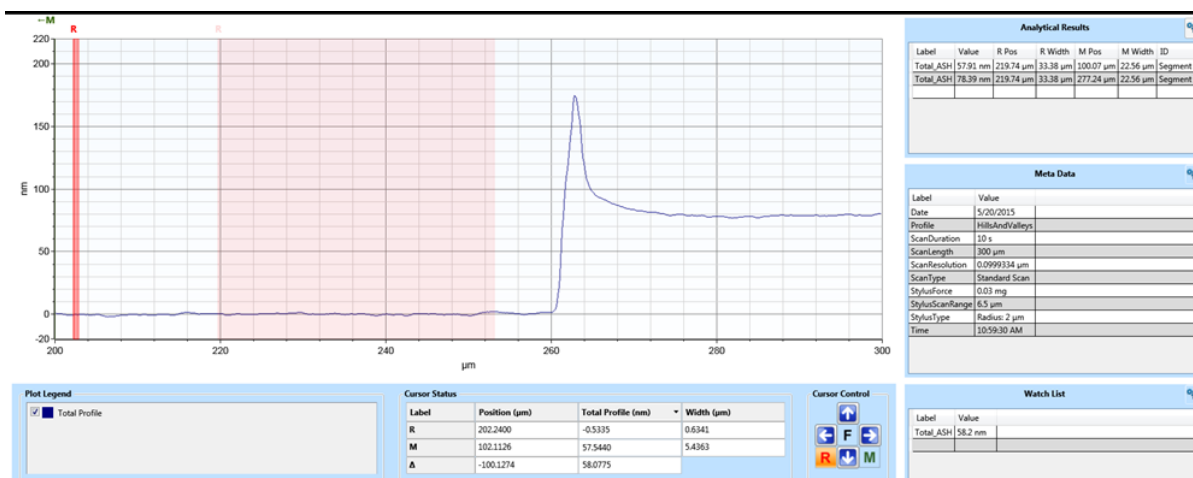

**Fig. S3** Thickness of the MoO<sub>3</sub> nanosheet using for the MSM UVPD measured by Bruker Dektak XT profilometer, which is found to be 78.4 nm.
